# Supplementary material
Source: MDPI journal article supplement (https://www.mdpi.com/2073-4441/10/12/1791)
Supplement: s1 [file s1]

*Supplementary Materials*

# Removal of Organic Micropollutants by Grainy Bentonite-Activated Carbon Adsorbent in a Fixed Bed Column

Gabriela Kamińska

Institute of Water and Wastewater Engineering, Silesian University of Technology, 44-100 Gliwice, Poland

\* Correspondence: gabriela.kaminska@polsl.pl; Tel.: +48-32-237-27-77

**Table S1.** Reduction degree at flow 6 mL/min.

|                | <b>Column I</b> | <b>Column II</b> | <b>Column III</b> |
|----------------|-----------------|------------------|-------------------|
| Colour         | 29%             | 36%              | 39%               |
| Absorbance     | 21%             | 25%              | 37%               |
| Phenolic index | 12%             | 21%              | 20%               |
